# Supplementary material for: CNGA3 acts as a cold sensor in hypothalamic neurons
Source: eLife journal article supplement (doi:10.7554/elife.55370), 2020-04-09
Supplement: supp [file elife-55370-supp-v1.zip]

Archive with 11 entries (11 files):
- elife_poa_e55370_Figure_8_source_data_1.xlsx
- elife_poa_e55370_Figure_2_source_data_1.xlsx
- elife_poa_e55370_Figure_4_source_data_1.xlsx
- elife_poa_e55370_Figure_3_source_data_1.xlsx
- elife_poa_e55370_Figure_5_source_data_1.xlsx
- elife_poa_e55370_Figure_7_figure_supplement_1.pdf
- elife_poa_e55370_Figure_7_source_data_1.xlsx
- elife_poa_e55370_Figure_1_source_data_1.xlsx
- elife_poa_e55370_Figure_9_source_data_1.xlsx
- elife_poa_e55370_Figure_6_source_data_1.xlsx
- elife_poa_e55370_Transparent_Reporting_File.pdf
