# Supplementary material for: CNGA3 acts as a cold sensor in hypothalamic neurons
Source: eLife journal article supplement (doi:10.7554/elife.55370), 2020-04-09
Supplement: supp [file elife-55370-supp-v1.zip › elife_poa_e55370_Figure_1_source_data_1.xlsx]

## Sheet: Sheet1
Figure 1 panel C		Mouse	Squirrel		Figure 1 panel E		Mouse	Squirrel
		16.57	3.57				18.18	0
		5.03	7.89				0	25
		12.99	0.96				0	28.57
		9.86	7.27				0	0
		4.83	17.65				0	0
		4.76	11.11				22.22	15.38
		12	10.28				0	50
		10	7.62				0	0
		7.69	9.24				9.09	50
		11.65	5.77				0	0
		8.05	11.54				12.5	15.38
		11.63	12.5				0	0
		11.54	14.14				22.22	10
		4.85	14.29				44.44	22.22
		8.74	4.73				0	25
		11.76	4.49				8.33	50
		9.62	4.11				6.67	0
		7.45	4.92				64.29	50
		4.85	17.58				13.04	0
		1.57	5.88				38.89	18.18
		2.88	9.21				11.11	77.78
		2.8	3.51				0	8.33
		6.29	1.03				5.26	16.67
		3.14	5.96				0	0
		5.31	8.7				0	0
		4.13	4				0	50
		5.94	5.77				0	25
		5.28	0.6				15.38	0
		2.33	2.61				11.76	14.29
		14.29	2.61				22.22	0
		11.96	3.03				52.63	0
		30	0				38.96	0
		15.16	2.33				85.51	0
		20.29						0
		12.78						11.11
		21.26						0
		15.09						9.09
		15.65						8.57
		15.38						7.69
		9.41
		28.06
		25.77
		17.39
		18.1
		9.79
		5
		12.41
		6.25
		4.5
		6.48
		6.67
		8.43
		5.85
		5.05
		2.21
		3.7
