# Supplementary material for: CNGA3 acts as a cold sensor in hypothalamic neurons
Source: eLife journal article supplement (doi:10.7554/elife.55370), 2020-04-09
Supplement: supp [file elife-55370-supp-v1.zip › elife_poa_e55370_Figure_2_source_data_1.xlsx]

## Sheet: Sheet1
Figure 2 panel B		Cnga3
		cold-	cold+
		3.89	37.93
		1.02	63.26
		3.72	21.27
