# Supplementary material for: CNGA3 acts as a cold sensor in hypothalamic neurons
Source: eLife journal article supplement (doi:10.7554/elife.55370), 2020-04-09
Supplement: supp [file elife-55370-supp-v1.zip › elife_poa_e55370_Figure_3_source_data_1.xlsx]

## Sheet: Sheet1
Figure 3 Panel B		Control	Diltiazem
		3.27869	0
		11.8644	0
		8.10811	0
		4.08163	0
		8.77193
Figure 3 Panel C		Control	Diltiazem
		0.9982	1.004
		1.054	0.8413
		1.136	0.9146
		0.9188	0.899
		1.01
Figure 3 Panel E		Control	Diltiazem
		22.069	38.8349
		54.7368	42.268
		56.4516	54.6392
Figure 3 Panel F		Control	Diltiazem
		0.9251	1.025
		0.9303	0.9345
		0.7787	0.966
