# Supplementary material for: CNGA3 acts as a cold sensor in hypothalamic neurons
Source: eLife journal article supplement (doi:10.7554/elife.55370), 2020-04-09
Supplement: supp [file elife-55370-supp-v1.zip › elife_poa_e55370_Figure_4_source_data_1.xlsx]

## Sheet: Sheet1
Figure 4 panel A right		22oC	12oC
		0.423782	0.457352
		0.125296	0.119192
		0.250418	0.25347
		0.268832	0.168124
		0.253729	0.220159
		0.106555	0.124865
Figure 4 panel B right		22oC	12oC
		0.442145	3.60987
		0.378058	2.09009
		0.45761	1.27548
		0.55206	2.05963
		0.433627	1.42545
		0.253573	1.13248
Figure 4 panel C right		22oC	12oC
		0.158331	0.109503
		0.253194	0.22878
		0.40542	0.567163
		0.210263	0.182797
		0.262143	0.225521
		0.198004	0.167486
Figure 4 panel D		mCNGA3 0	mCNGA3 1	sqCNGA3 1
		1.07922	8.16445	0.691608
		0.951283	5.5285	0.903576
		1.01219	2.78727	1.39895
		0.625387	3.73081	0.869373
		0.867693	3.28727	0.860298
		1.17184	4.46609	0.845872
			3.34136	1.17262
			2.31994	1.2379
Figure 4 panel E right		22oC	12oC
		3.89789	4.54093
		2.56527	5.4162
		1.8218	5.10218
		5.95098	4.68078
		3.07612	3.14169
		4.82221	5.00316
