# Supplementary material for: CNGA3 acts as a cold sensor in hypothalamic neurons
Source: eLife journal article supplement (doi:10.7554/elife.55370), 2020-04-09
Supplement: supp [file elife-55370-supp-v1.zip › elife_poa_e55370_Figure_5_source_data_1.xlsx]

## Sheet: Sheet1
Figure 5 panel A left		Cngb1			Figure 5 panel A right		Cngb3
		cold-	cold+				cold-	cold+
		14.02	42.81				1.32	32.81
		8.69	14.13				0	0
		14.68	12.05				0	0
Figure 5 panel C		mA3	mA3/mB1
		19.7	31
		16.2	34.7
		18.9	29.7
		16.1	32
		13.6	44.3
		15	51
