# Supplementary material for: CNGA3 acts as a cold sensor in hypothalamic neurons
Source: eLife journal article supplement (doi:10.7554/elife.55370), 2020-04-09
Supplement: supp [file elife-55370-supp-v1.zip › elife_poa_e55370_Figure_6_source_data_1.xlsx]

## Sheet: Sheet1
Figure 6 panel A		Cnga2
		cold-	cold+
		6.08	0
		10.6	0
		0	3.09
Figure 6 panel C		mCNGA3 22C	mCNGA3 12C	mCNGA2 22C	mCNGA2 12C
		-0.39978	-4.16565	-0.39978	-0.48828
		-0.2594	-2.94495	-0.23804	-0.20447
		-0.40283	-5.34363	-0.19531	-0.24719
		-0.18005	-2.58179	-0.39978	-0.54016
		-0.54016	-5.9845	-0.9491	-0.90942
		-0.32959	-3.49426	-1.62048	-1.85852
				-2.12402	-2.03857
Figure 6 panel D		mCNGA3
		-9.77478
		-15.036
		-19.3848
