# Supplementary material for: CNGA3 acts as a cold sensor in hypothalamic neurons
Source: eLife journal article supplement (doi:10.7554/elife.55370), 2020-04-09
Supplement: supp [file elife-55370-supp-v1.zip › elife_poa_e55370_Figure_7_source_data_1.xlsx]

## Sheet: Sheet1
Figure 7 panel A middle		22oC	12oC			Figure 7 panel A right		22oC	12oC
		136.11	79.35					29.9072	24.4141
		109.86	60.42					26.8555	24.4141
		189.21	95.83					39.6728	86.0596
		426.03	336.3					294.8	341.797
		388.18	193.48					23.1934	21.3623
		215.45	133.06					25.6348	23.1934
Figure 7 panel B middle		22oC	12oC			Figure 7 panel B right		22oC	12oC
		120.24	572.51					28.6865	48.2178
		123.9	563.96					37.8418	210.571
		194.09	390.63					41.5039	42.1143
		133.06	864.26					31.7383	339.966
		187.38	655.52					22.583	490.112
		329.59	674.44					8.54492	36.6211
		183.11	385.74					18.3105	28.6865
		143.43	272.83					30.5176	34.1797
Figure 7 panel C middle		22oC	12oC			Figure 7 panel C right		22oC	12oC
		120.85	87.28					25.0244	23.1934
		142.21	90.94					23.1934	22.583
		107.42	79.96					21.9727	23.8037
		316.16	243.53					233.154	179.443
		281.98	158.69					56.7627	39.6728
		66.53	32.35					34.1797	30.5176
Figure 7 panel D left		control	mCNGA3	sqCNGA3		Figure 7 panel D right		control	mCNGA3	sqCNGA3
		0.58	4.76	0.72				0.82	1.68	0.93
		0.55	4.55	0.64				0.91	5.56	0.97
		0.51	2.01	0.74				2.17	1.01	1.08
		0.79	6.5	0.77				1.16	10.71	0.77
		0.5	3.5	0.56				0.92	21.7	0.7
		0.62	2.05	0.49				0.9	4.29	0.89
			2.11						1.57
			1.9						1.12
Figure 7 panel F left		control	mCNGA3	sqCNGA3		Figure 7 panel F right		control	mCNGA3	sqCNGA3
		159.91	1103.52	2368.77				62.26	133.667	169.067
		57.37	648.8	1563.11				43.9453	173.34	145.264
		297.85	753.17	966.19				24.4141	92.7734	352.783
		125.12	1373.29	1503.91				43.9453	444.946	155.64
		172.73	842.9	1378.78				28.0762	113.525	101.318
		138.55	590.21	1957.4				22.583	83.6182	136.719
								32.3486
