# Supplementary material for: CNGA3 acts as a cold sensor in hypothalamic neurons
Source: eLife journal article supplement (doi:10.7554/elife.55370), 2020-04-09
Supplement: supp [file elife-55370-supp-v1.zip › elife_poa_e55370_Figure_8_source_data_1.xlsx]

## Sheet: Sheet1
Figure 8 panel C		seg I	seg II
		1.00004	5.50624
		1.77597	6.16995
		0.939679	5.06274
		0.912768	5.64688
		1.08076	4.70115
		1.05867	5.99806
		0.927307	7.41654
		0.816792	9.37164
		0.811485	8.61372
Figure 8 panel D		mCNGA3
		22.708
		26.2512
		24.0268
		24.0268
		22.708
		21.4008
		17.9708
		21.4008
		20.9676
