# Supplementary material for: CNGA3 acts as a cold sensor in hypothalamic neurons
Source: eLife journal article supplement (doi:10.7554/elife.55370), 2020-04-09
Supplement: supp [file elife-55370-supp-v1.zip › elife_poa_e55370_Figure_9_source_data_1.xlsx]

## Sheet: Sheet1
Figure 9 panel C		cGMP, µM	mCNGA3 22oC				mCNGA3 12oC
		0	0	0	0	0	0	0	0	0
		0.2	0.0107	0.0178	0	0	0.0143	0	0	0.1097
		2	0.2792	0.2818	0.2806	0.2085	0.0143	0.0711	0.0501	0.1866
		10	0.68	0.5585	0.5211	0.5597	0.2291	0.325	0.1704	0.4061
		20	0.7266	0.622	0.5712	0.7792	0.5512	0.6296	0.3207	0.5926
		50	0.884	0.6905	0.6413	0.7682	0.8375	0.7565	0.4309	0.5707
		100	0.8876	0.6981	0.8217	0.6146	0.927	0.8733	0.7115	0.856
		300	0.8626	0.6956	0.7416	0.7133	1.0165	0.9952	0.8317	0.845
Figure 9 panel D		cGMP, µM	sqCNGA3 22oC					sqCNGA3 12oC
		0	0	0	0	0	0	0	0	0	0	0
		0.2	0.0008	0	0.0032	0.0047	0.0051	0	0	0.0071	0.0047	0.0122
		2	0.0132	0.0147	0.0201	0.0174	0.0259	0.0273	0.026	0.0159	0.0241	0.0274
		10	0.104	0.096	0.1231	0.077	0.1414	0.1429	0.1164	0.1397	0.1956	0.2063
		20	0.2122	0.2068	0.2199	0.1353	0.2386	0.3146	0.3107	0.3917	0.4407	0.4764
		50	0.4129	0.3457	0.3228	0.2585	0.3335	0.678	0.7197	0.7467	0.7897	0.8255
		100	0.4533	0.3988	0.3293	0.3115	0.3761	0.8547	0.914	0.9078	0.9344	0.9379
		300	0.4641	0.4192	0.4011	0.355	0.4069	0.9736	0.9829	0.9906	0.9839	0.9944
Figure 9 panel E		mCNGA3	mCNGA3	sqCNGA3	sqCNGA3
		22oC	12oC	22oC	12oC
		18.82	3.92	32.18	21.14
		15.91	2.92	30.53	20.82
		50.93	4.68	26.65	17.79
		17.5	3.51	23.16	28.98
				21.46	16.42
Figure 9 panel F		mCNGA3	mCNGA3	sqCNGA3	sqCNGA3
		22oC	12oC	22oC	12oC
		1	0.8626	1	0.4641
		1	0.6956	1	0.4192
		1	0.7416	1	0.4011
		1	0.7133	1	0.355
				1	0.4069
