# Supplementary figures and images for: CNGA3 acts as a cold sensor in hypothalamic neurons
Source: eLife journal article supplement (doi:10.7554/elife.55370), 2020-04-09

mCNGA3

25  
T, °C  
10

200 pA  
30 s

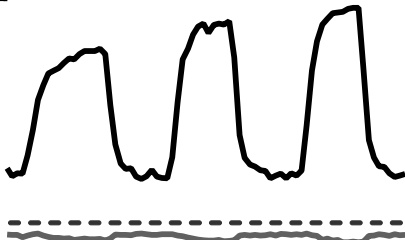

90 mV

-90 mV

Supplement: supp [file elife-55370-supp-v1.zip › elife_poa_e55370_Figure_7_figure_supplement_1.pdf]
